# Supplementary material
Source: Royal Society of Chemistry journal article supplement (doi:10.1039/d5fo04609b)
Supplement: d5fo04609b1.xlsx [file d5fo04609b1.xlsx]

## Sheet: Fig1_Seizure_scores
Group	Days	Mean (Racine score)	SD(Racine score)	Mean (Tonic score)	SD(Tonic score)	Mean (Clonic score)	SD(Clonic score)
PTZ	0	0	0	—	—	—	—
	3	1	0	751.4	23.13	610.4	23.13
	6	1.83	0.41	729.8	41.93	502	41.93
	9	2.17	0.41	670	45.49	441.8	45.49
	12	3.33	0.82	591.4	49.71	386.8	49.71
	15	3	0.63	569.6	38.95	341	38.95
	18	3	0.63	574	59.26	313.6	59.26
	21	3.33	0.52	539.2	23.42	322.6	23.42
	24	3.33	0.52	437.8	45.28	232	45.28
	27	3.17	0.98	355.6	43.67	173.2	43.67
	30	3.83	0.98	389.6	46.48	158	46.48
	33	3.67	0.82	381.2	40.24	133	40.24
PTZ+DM-25	0	0	0	—	—	—	—
	3	2.67	0	751.4	23.13	621.4	23.13
	6	1.33	0.41	729.8	41.93	595.8	41.93
	9	2	0.41	670	45.49	520	45.49
	12	2.5	0.82	591.4	49.71	461.4	49.71
	15	1.33	0.63	569.6	38.95	439.6	38.95
	18	2.33	0.63	574	59.26	444	59.26
	21	3	0.52	539.2	23.42	393.2	23.42
	24	3.17	0.52	437.8	45.28	307.8	45.28
	27	3	0.98	355.6	43.67	275.6	43.67
	30	3	0.98	389.6	46.48	259.6	46.48
	33	3.17	0.82	381.2	40.24	251.2	40.24
PTZ+DM-50	0	0	0	—	—	—	—
	3	1.17	0.41	900	0	749.2	38.1
	6	1	0.63	900	0	613	72.94
	9	1.67	0.52	771.8	41.41	588.8	40.86
	12	1.33	0.52	750.8	43.46	536	67.18
	15	1.5	0.55	708.6	27.9	499.2	29.59
	18	1.17	0.75	680.4	40.72	508.8	39.62
	21	1	0.89	629.4	39.85	446.8	50.44
	24	1.33	0.82	600	42.08	430.4	47.84
	27	0.67	0.82	549.6	42.57	365.2	44.05
	30	1.33	1.03	514.4	36.53	342.8	42.89
	33	1	0.63	471.8	42.1	314.6	39.16
PTZ+DM-100	0	0	0	—	—	—	—
	3	1	0.63	859.2	38.1	679.4	25.97
	6	0.5	0.55	708	72.94	617.6	27.18
	9	1.67	0.82	721.8	40.86	674.6	29.3
	12	0.83	0.75	635	67.18	622	41.98
	15	3.17	1.17	626.2	29.59	518.2	45.49
	18	2	0.89	603.8	39.62	546.2	38.09
	21	3	0.63	579.8	50.44	541.8	31.89
	24	3.83	0.75	540.4	47.84	410.8	39.46
	27	3.33	1.37	475.2	44.05	354	39.14
	30	4.17	0.75	452.8	42.89	364.2	42.01
	33	2.33	1.03	424.6	39.16	297.8	48.74
PTZ+VPA	0	0	0	—	—	—	—
	3	0.83	0.408248	879.4	25.9673	600	0
	6	0.5	0.547723	877.6	27.1809	600	0
	9	1.5	0.83666	874.6	29.2968	537.8	41.415
	12	2	0.894427	877	41.9762	450.8	43.4592
	15	2	0.632456	755.2	45.4885	421.6	27.898
	18	1.67	0.516398	746.2	38.0946	411.4	40.7161
	21	1.33	0.516398	741.8	31.8936	391.4	39.8535
	24	1.83	0.752773	610.8	39.4614	302	0
	27	1.67	0.516398	554	39.1408	320.6	42.5652
	30	1.17	0.752773	564.2	42.0143	285.4	36.5281
	33	1.5	0.547723	497.8	48.736	242.8	42.1034

## Sheet: Fig2_Escape latency 
Group	Escape latency(s)
	mean	SD
Control	59.08	1.01
	37.43	7.31
	21.76	5.33
	14.52	3.76
PTZ	60	0
	50.58	5.52
	39.97	2.56
	39.96	3.61
PTZ+DM-25	58.66	1.16
	44.7	4.15
	38.87	3.42
	35.11	3.96
PTZ+DM-50	56.19	3.6
	35.2	5.2
	27.07	6.39
	20.98	2.71
PTZ+DM-100	57.05	2.85
	53.27	1.84
	33.9	5.83
	35.01	4.83
PTZ+VPA	60	0
	47.94	2.93
	40.05	4.93
	36.82	3.93

## Sheet: Fig2_Platform crossings
Group	Crossing times of the platform (No.)
	mean	SD
Control	28.62	3.06
PTZ	20.77	2.16
PTZ+DM-25	24.91	4.03
PTZ+DM-50	27.02	2.11
PTZ+DM-100	26.95	2.97
PTZ+VPA	22.8	1.45

## Sheet: Fig2_ target quadrant
Group	Time in the target quadrant (s)
	mean	SD
Control	20.76	1.85
PTZ	13.04	3.27
PTZ+DM-25	15.51	3.27
PTZ+DM-50	19.47	2.22
PTZ+DM-100	16.52	4.79
PTZ+VPA	15.2	2.87

## Sheet: Fig2_Swimming speed
Group	Swimming speed (mm/s)
	mean	SD
Control	28.62	3.06
PTZ	20.77	2.16
PTZ+DM-25	24.91	4.03
PTZ+DM-50	27.02	2.11
PTZ+DM-100	26.95	2.97
PTZ+VPA	22.8	1.45

## Sheet: Fig3_Distance traveled
Group	Distance traveled (mm)
Control	30384.1
	20363.6
	31009.5
PTZ	15706.3
	16076
	21364.9
PTZ+DM-25	27572
	25942.1
	26095.9
PTZ+DM-50	27778.2
	25944.5
	34942.2
PTZ+DM-100	22256.4
	22151.8
	23148.5
PTZ+VPA	16774.9
	20023.8
	21523.2

## Sheet: Fig3_Rearing number
Group	Number of rearing (No.)
Control	30
	27
	—
	—
	25
	20
PTZ	14
	12
	20
	21
	27
	19
PTZ+DM-25	41
	30
	37
	10
	100
	—
PTZ+DM-50	41
	11
	40
	35
	61
	44
PTZ+DM-100	31
	30
	42
	38
	—
	44
PTZ+VPA	0
	—
	27
	—
	21
	24

## Sheet: Fig3_Time in center
Group	Time in center (s)
Control	28.9
	26.21
	29.43
PTZ	21.8
	23.11
	25.33
PTZ+DM-25	27.7
	23.01
	30.23
PTZ+DM-50	34.5
	28.81
	38.03
PTZ+DM-100	30.2
	32.51
	34.73
PTZ+VPA	24.6
	18.41
	28.63

## Sheet: Fig3_Time in open arms
Group	Time in open arms (%)
Control	48.697
	50.728
	39.445
PTZ	30.038
	34.603
	33.568
PTZ+DM-25	46.281
	22.914
	39.058
PTZ+DM-50	40.644
	49.414
	42.73
PTZ+DM-100	33.107
	44.869
	30.708
PTZ+VPA	44.115
	24.371
	38.933

## Sheet: Fig3_Entries of open arms
Group	Entries of open arms (No.)
Control	10
	14
	16
PTZ	8
	6
	6
PTZ+DM-25	10
	16
	10
PTZ+DM-50	17
	12
	14
PTZ+DM-100	18
	14
	8
PTZ+VPA	13
	4
	14

[truncated: 6 more sheets: Fig5_Cell viability, Fig5_Apoptosis rate, Fig6_ELISA cytokines, Fig7_Western blot, Fig8_mRNA, Fig8_cell_cytokines]
